# Supplementary material for: Synthesis of double Z-scheme CdS/Bi2O2CO3/BiOCl heterojunction photocatalysts for degradation of rhodamine B under visible light
Source: Royal Society of Chemistry journal article supplement (doi:10.1039/d3re00407d), 2023-10-13
Supplement: d3re00407d1.pdf [file d3re00407d1.pdf]

## Supplementary information

### Synthesis of double Z-scheme CdS/Bi<sub>2</sub>O<sub>2</sub>CO<sub>3</sub>/BiOCl heterojunction photocatalysts for degradation of Rhodamine B under visible light

Yueyi Li, Yuehui Liu, Xuguang Liu, Xia Li✉

College of Materials Science and Technology, Qingdao University of Science & Technology, Qingdao

266042 P.R. China

✉ To whom correspondence should be addressed. E-mail: lix@qust.edu.cn

## 2. Experimental Section

### Materials.

two points of cadmium chloride pentahydrate (CdCl<sub>2</sub>·2.5H<sub>2</sub>O), potassium chloride (KCl), thiourea (CH<sub>4</sub>N<sub>2</sub>S), Bismuth nitrate (Bi(NO<sub>3</sub>)<sub>3</sub>·5H<sub>2</sub>O), urea (CH<sub>4</sub>N<sub>2</sub>O), anhydrous ethanol (C<sub>2</sub>H<sub>6</sub>O), isopropyl alcohol (IPA), ethylenediaminetetraacetic acid disodium salt (EDTA-2Na) and benzoquinone (BQ), terephthalic acid (TA), nitro blue tetrazolium (NBT) were all purchased from Aladdin Chemical Reagent Co. Ltd. and were of analytical grade purity. All reagents are not purified.

### Synthesis of Bi<sub>2</sub>O<sub>2</sub>CO<sub>3</sub> (BSC).

Bi(NO<sub>3</sub>)<sub>3</sub>·5H<sub>2</sub>O (1.947 g), KCl (0.1 g) and CH<sub>4</sub>N<sub>2</sub>O (1.21 g) were added to 40 ml of deionized water and stirred for 1 hour. After stirring, the solution was placed in a PTFE-lined reaction vessel and kept at 160°C for 24 hours. After being cooled to room temperature, the obtained white powders were washed 3 times each with deionized water and ethanol, filtered and dried (60°C, 24h).

### Synthesis of BiOCl (BOC).

Bi(NO<sub>3</sub>)<sub>3</sub>·5H<sub>2</sub>O (2.021 g) and KCl (0.315 g) were added to 40 ml of deionized water and stirred for 1 hour. After stirring, the solution was put into a PTFE-lined reactor and kept at 160°C for 24 hours. After being cooled to room temperature, the obtained white powders were washed 3 times each with deionized water and ethanol, filtered and dried (60°C, 24h).

**Synthesis of CdS.**

$\text{CdCl}_2 \cdot 2.5\text{H}_2\text{O}$  (1.522 g) and  $\text{CH}_4\text{N}_2\text{S}$  (2.533 g) were added to 40 ml of deionized water and stirred for 1 hour. After stirring, the solution was put into a PTFE-lined reactor and kept at  $160^\circ\text{C}$  for 24 hours. After being cooled to room temperature, the obtained orange powders were washed 3 times each with deionized water and ethanol, filtered and dried ( $60^\circ\text{C}$ , 24h).

**Synthesis of  $\text{Bi}_2\text{O}_2\text{CO}_3/\text{BiOCl}$  (BSC/BOC).**

$\text{Bi}(\text{NO}_3)_3 \cdot 5\text{H}_2\text{O}$  (2.021 g), KCl (0.0.315 g) and  $\text{CH}_4\text{N}_2\text{O}$  (0.25 g) were added to 40 ml of deionized water and stirred continuously for 1 hour. After stirring, the solution was placed in a PTFE-lined reactor and kept at  $160^\circ\text{C}$  for 24 hours. After being cooled to room temperature, the obtained composites were washed 3 times each with deionized water and ethanol, filtered and dried ( $60^\circ\text{C}$ , 24h).

**Synthesis of  $\text{Bi}_2\text{O}_2\text{CO}_3/10\text{mol}\%\text{CdS}$  (BSC/10CdS).**

$\text{Bi}(\text{NO}_3)_3 \cdot 5\text{H}_2\text{O}$  (1.947 g), KCl (0.1 g) and  $\text{CH}_4\text{N}_2\text{O}$  (1.21 g) were added to 25ml of deionized water and stirred for 1 h, record as solution A. Then  $\text{CdCl}_2 \cdot 2.5\text{H}_2\text{O}$  (0.096 g) and  $\text{CH}_4\text{N}_2\text{S}$  (0.16 g) were dissolved in 15ml of deionized water and stirred for 1 hour, recorded as solution B. Solution B was added to solution A and stirred for another 1 hour. After stirring, put the mixed solution into a PTFE-lined reactor and kept at  $160^\circ\text{C}$  for 24 hours. After being cooled to room temperature, the obtained samples were washed 3 times each with deionized water and ethanol, filtered and dried ( $60^\circ\text{C}$ , 24h).

**Synthesis of  $\text{BiOCl}/10\text{mol}\%\text{CdS}$  (BOC/10CdS).**

$\text{Bi}(\text{NO}_3)_3 \cdot 5\text{H}_2\text{O}$  (2.021 g) and KCl (0.315 g) were added to 25ml of deionized water and stirred for 1 h, record as solution A. Then  $\text{CdCl}_2 \cdot 2.5\text{H}_2\text{O}$  (0.096 g) and  $\text{CH}_4\text{N}_2\text{S}$  (0.16 g) were dissolved in 15ml of deionized water and stirred for 1 hour, recorded as solution B. Solution B was added to solution A and stirred for another 1 hour. After stirring, put the mixed solution into a PTFE-lined reactor and kept at  $160^\circ\text{C}$  for 24 hours. After being cooled to room temperature, the obtained samples were washed 3 times each with deionized water and ethanol, filtered and dried ( $60^\circ\text{C}$ , 24h).

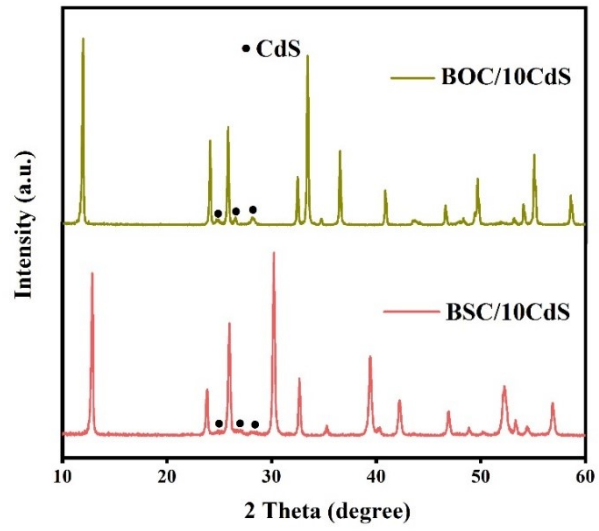

Fig. S1 XRD patterns of BSC/10CdS, BOC/10CdS

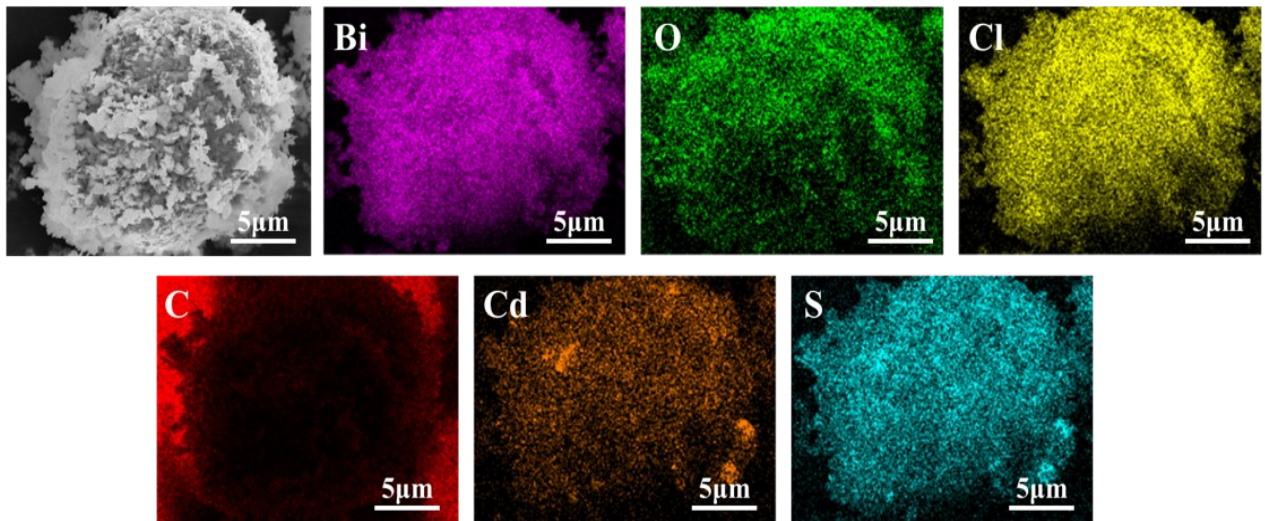

Fig. S2 Elemental mapping to the SEM image of 10CBB

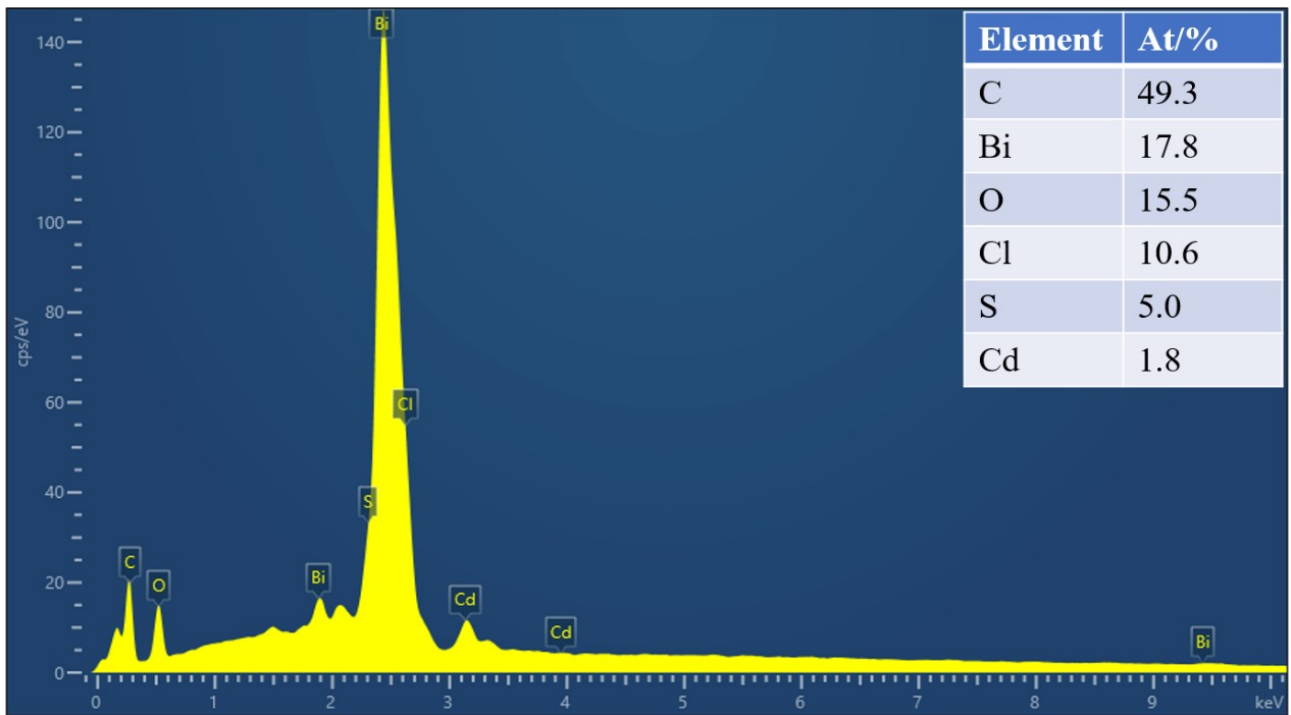

Fig. S3 EDS spectrum of 10CBB

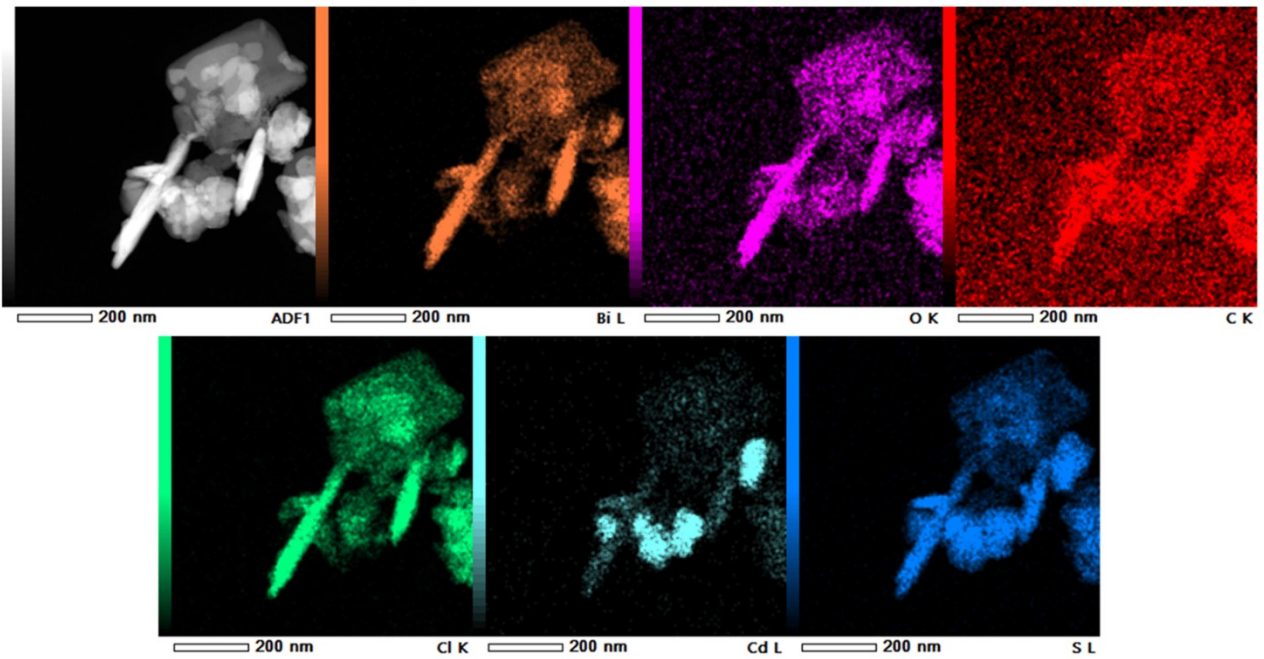

Fig. S4 Elemental mapping to the TEM image of 10CBB

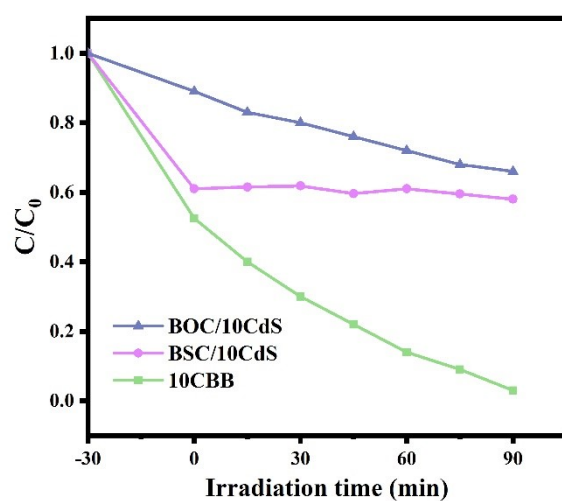

Fig. S5 Comparison of photocatalytic activity of 10CBB with BOC/10CdS and BSC/10CdS

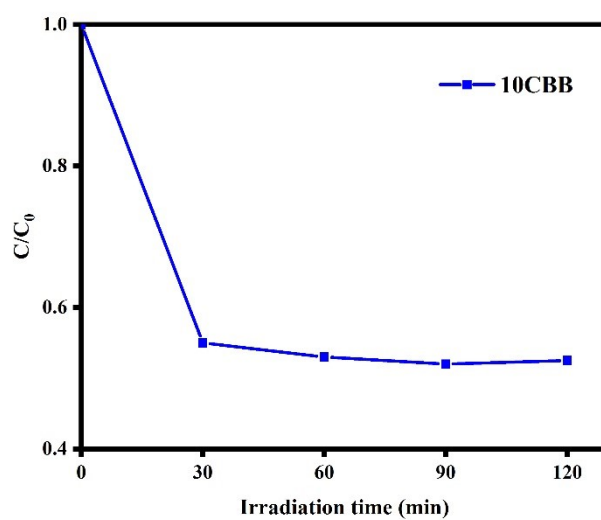

Fig. S6 Adsorption curve of 10CBB in the dark conditions

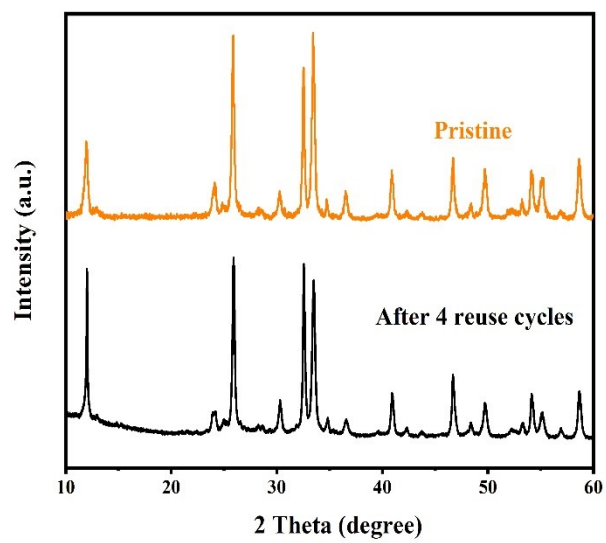

Fig. S7 XRD patterns of 10BB before and after cycling

**Table S1** Comparison of the catalytic effect of CdS/ Bi<sub>2</sub>O<sub>2</sub>CO<sub>3</sub>/BiOCl with other catalysts for degradation of RhB

| Photocatalysts                                                                | Catalysts dosage (g) | Pollutant Concentration     | Light source           | Removal Efficiency (%) | Time (min) | Ref.      |
|-------------------------------------------------------------------------------|----------------------|-----------------------------|------------------------|------------------------|------------|-----------|
| <b>CdS/Bi<sub>2</sub>O<sub>2</sub>CO<sub>3</sub>/BiOCl</b>                    | 0.1                  | 20 mg/L, 100 mL             | 300W, λ>420 nm         | 97                     | 90         | This Work |
| <b>Ag/g-C<sub>3</sub>N<sub>4</sub>/BiVO<sub>4</sub></b>                       | 0.0125               | 5 mg/L, 25 mL               | 300W, λ>400 nm         | 99                     | 90         | [1]       |
| <b>Cu-In<sub>2</sub>S<sub>3</sub></b>                                         | 0.02                 | 5 mg/L, 50 mL               | 300W, λ>420 nm         | About 92               | 60         | [2]       |
| <b>Biochar/Bi<sub>2</sub>WO<sub>6</sub></b>                                   | 0.05                 | 10 mg/L, 50 mL              | 500W, λ>420 nm         | 99.9                   | 270        | [3]       |
| <b>CC/ZnO@Ag<sub>3</sub>PO<sub>4</sub></b>                                    | ~                    | 10 <sup>-5</sup> M, 60 mL   | LED, λ=420 nm          | 87.1                   | 100        | [4]       |
| <b>ZnO/ZnMoO<sub>4</sub></b>                                                  | 0.01                 | 2*10 <sup>-4</sup> M, 50 mL | 125W lamp,<br>λ=420 nm | 83.7                   | 120        | [5]       |
| <b>C/F-Ag-TiO<sub>2</sub></b>                                                 | 0.05                 | 10 mg/L, 100 mL             | 150W                   | 84.2                   | 240        | [6]       |
| <b>BOC-CTAB</b>                                                               | 0.05                 | 10 mg/L, 100 mL             | 300W, λ>420 nm         | 99                     | 20         | [7]       |
| <b>NiTiO<sub>3</sub>-BiOBr</b>                                                | 0.03                 | 20 mg/L, 30 mL              | 400W, λ>420 nm         | 96.6                   | 90         | [8]       |
| <b>g-C<sub>3</sub>N<sub>4</sub>/Bi<sub>4</sub>O<sub>5</sub>Br<sub>2</sub></b> | 0.1                  | 10 mg/L, 100 mL             | 500W, λ>420 nm         | 98.1                   | 90         | [9]       |

## References

1. L.A.T. Hoang, N. Le-Duy, T.D. Nguyen, T. Lee, *ChemistrySelect*, 2023, **8**, e202301024-e202301032.
2. Y. Wang, Y. Zhu, H. Guan, Y. Hu, Y. Zhao, W. Zhang, Y. Gong, *Materials Letters*, 2023, **349**, 134843-134847.
3. X. Li, Y. Qu, J. Xu, J. Liang, H. Chen, D. Chen, L. Bai, *ACS Omega*, 2023, **8**, 26882-26894.
4. Y. Yi, Q. Guan, W. Wang, S. Jian, H. Li, L. Wu, H. Zhang, C. Jiang, *Toxics*, 2023, **11**, 70-82.
5. R. Firmansyah, R. Bakri, Y. Yulizar, *Inorganic Chemistry Communications*, 2023, **155**, 110893-110902.
6. Z. Chen, S. Yu, J. Liu, Y. Zhang, Y. Wang, J. Yu, M. Yuan, P. Zhang, W. Liu, J. Zhang, *Environmental Research*, 2023, **232**, 116311-116324.
7. T. Guo, X. Fan, X. Jiang, Y. Qi, J. Du, A. Zhang, H. Wang, *Journal of Alloys and Compounds*, 2023, **948**, 169586-169598.
8. K. Sun, M. Li, H. Zhou, X. Ma, W. Li, *Materials*, 2023, **16**, 5033-5045.
9. Y. Zhou, J. Zhang, D. Wu, *ChemistrySelect*, 2023, **8**, e202301237-e202301249.
